# Supplementary material for: Intratracheal Bleomycin Aerosolization: The Best Route of Administration for a Scalable and Homogeneous Pulmonary Fibrosis Rat Model?
Source: Hindawi journal article supplement (doi:10.1155/2015/198418), 2015-01-01

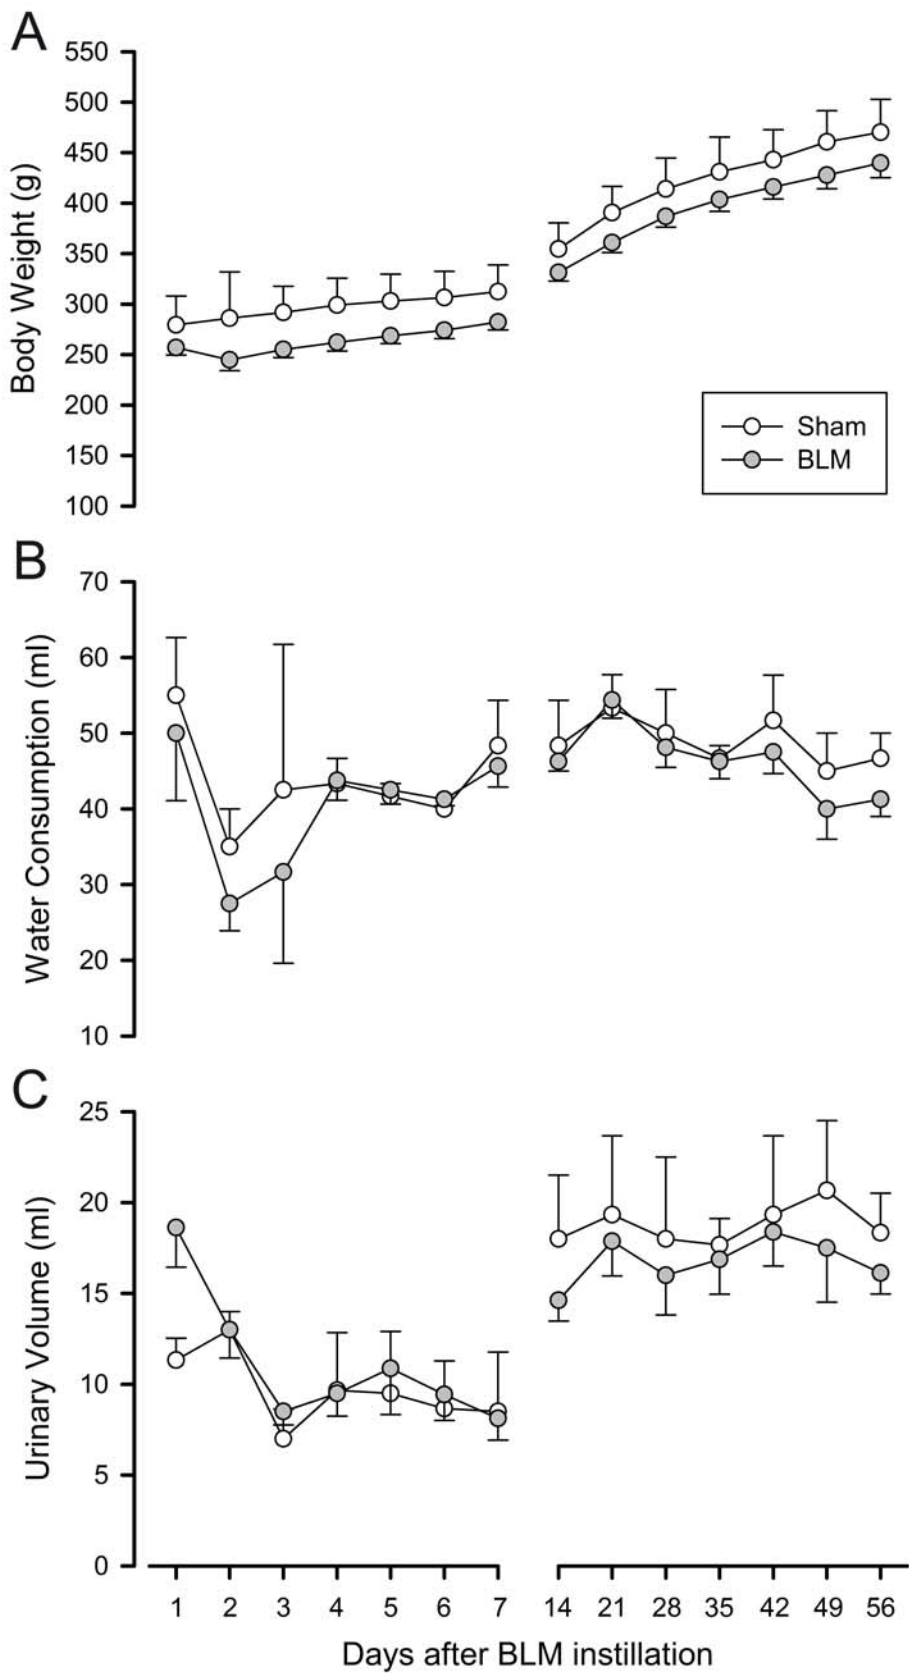

Supplement: f1 [file 198418.f1.pdf]
